# Supplementary material
Source: publisher site journal article supplement (https://www.dovepress.com/article/580064)
Supplement: Supplementary file 1 [file 580064%20Supplementary%20Material.docx]

**CARE (CAse REport) Checklist**

Manuscript title: Chronic Mycobacterium kansasii Pleural Infection Mimicking Metastatic Breast Cancer: A Seven-Year Diagnostic Odyssey and the Critical Role of Metagenomic Sequencing

Manuscript type: Case report

Journal: Current Medical Research and Opinion (planned submission)

Version date: 30 Aug 2025

This checklist is completed in accordance with the CARE reporting guideline.

| **CARE Item** | **Requirement (brief)** | **Where reported in manuscript** |
| --- | --- | --- |
| Title | Identifies the work as a case report; phenomenon of interest | Title page |
| Keywords | 2–8 key words (preferably MeSH) | Keywords (MeSH standardized) |
| Abstract | Structured abstract: Introduction; Case report; Conclusion; ≤250 words | Abstract (structured; ≤250 words) |
| Introduction | Brief background and rationale | Introduction |
| Patient information | De‑identified demographics; relevant medical history | Case report (first paragraphs) |
| Clinical findings | Pertinent clinical findings and exam results | Case report |
| Timeline | Key dates and clinical course in sequence | Case report (1996–2024 narrative timeline) |
| Diagnostic assessment | Diagnostic methods, challenges, reasoning; tests/imaging | Case report; Figures 1–2; Discussion |
| Therapeutic interventions | Interventions, drugs/doses, duration, changes | Case report (anti‑NTM regimens and adjustments) |
| Follow‑up and outcomes | Clinical course, outcomes, adverse events | Case report (VZV infection; cardiac events; death) |
| Discussion | Strengths/limitations; literature context; rationale | Discussion; Table 1 |
| Patient perspective | Patient’s perspective or experience (if available) | Not available (patient deceased prior to report) |
| Informed consent | Consent for publication obtained | Transparency declarations — Consent for publication |
| Ethical statement | IRB/ethics approval; compliance with standards | Transparency declarations — Ethics approval; Declaration of Helsinki statement |
| Diagnostic challenges | Pitfalls and differential diagnoses | Discussion (PET‑CT mimicry; pathology non‑diagnostic) |
| Take‑away lessons | Main learning points and implications | Conclusions |
| Reporting guideline compliance | Statement of CARE compliance and checklist location | Transparency declarations — Reporting guideline compliance |
